# Supplementary material for: A Multi-Disulfide Receptor-Binding Domain (RBD) of the SARS-CoV-2 Spike Protein Expressed in E. coli Using a SEP-Tag Produces Antisera Interacting with the Mammalian Cell Expressed Spike (S1) Protein
Source: MDPI journal article supplement (doi:10.3390/ijms23031703), 2022-02-01
Supplement: s1 [file s1]

## Supplementary Information

### Supplementary Figures

Figure S1

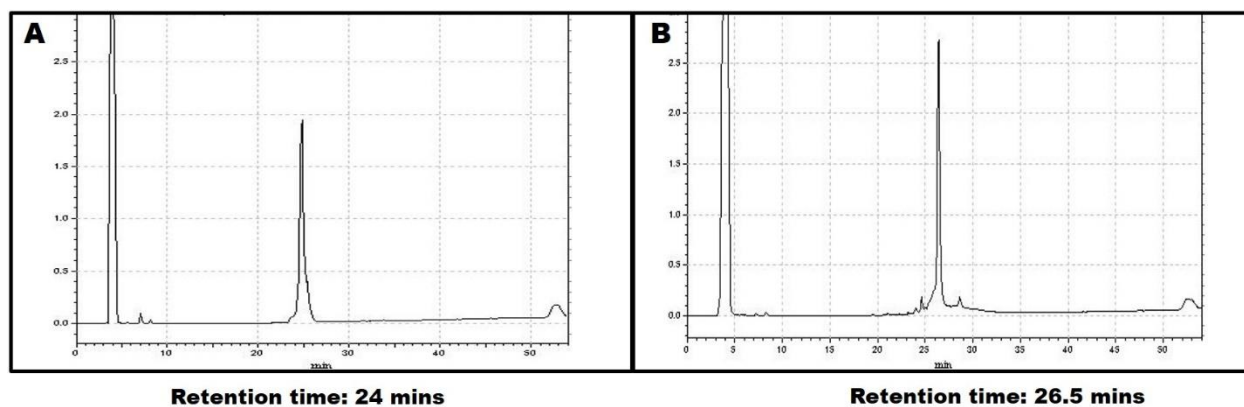

**Figure S1: RP-HPLC purification:** Elution profile of SARS-CoV-2-C9R (A) and reduced SARS-CoV-2-C9R [reduced with 100mM DTT].

Figure S2

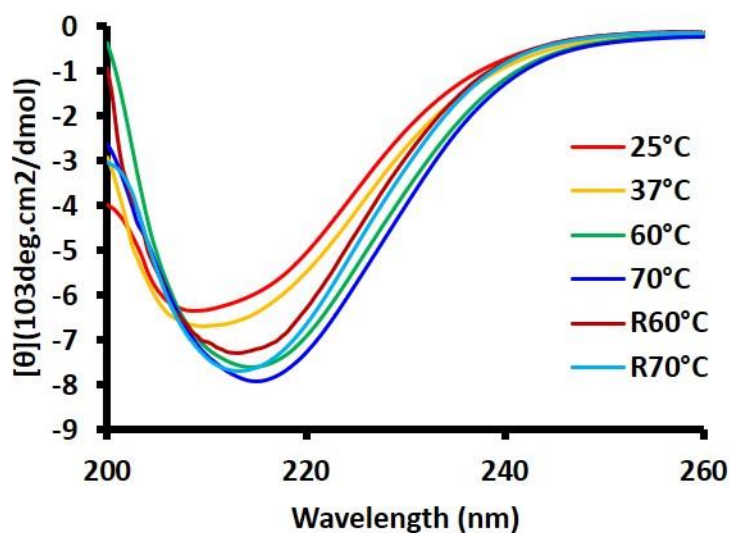

**Figure S2:** The secondary structures of SARS-CoV-2 were analyzed using far-UV CD region (200–260 nm) at a protein concentration of 0.3 mg/mL in 10mM Hepes buffer, pH 8.0.

**Table S1:** Estimation of EC50 values based on the reciprocal dilutions of the 5<sup>th</sup> tail bleeding RBD-C9R serum and immobilized antigens (Native spike (S1) protein and RBD-C9R protein).

|                                                                           | EC 50 Value |        |        |        |
|---------------------------------------------------------------------------|-------------|--------|--------|--------|
|                                                                           | Mice 1      | Mice 2 | Mice 3 | Mice 4 |
| Log 10 Reciprocal serum dilution<br>(Spike S1 protein as coating antigen) | 2.68        | 2.70   | 2.87   | 3.00   |
| Log 10 Reciprocal serum dilution<br>(RBD-C9R protein as coating antigen)  | 3.98        | 3.24   | 2.98   | 3.59   |
